# Supplementary material for: Surface modification of nano-silica with amides and imides for use in polyester nanocomposites
Source: Royal Society of Chemistry journal article supplement (doi:10.1039/c3ta10381a), 2013-01-01

Electronic Supplementary Information

## Surface modification of nano-silica with amides and imides for use in polyester nanocomposites

Smita Ghosh,<sup>a,b</sup> Shailesh K. Goswami<sup>\*a,b</sup> and Lon J. Mathias<sup>a</sup>

<sup>a</sup> School of Polymers and High Performance Materials, PO Box 10076, University of Southern Mississippi, Hattiesburg, MS 39406, USA

<sup>b</sup> Present Address, Department of Chemistry, University of Otago, Union place west, Dunedin 9016, New Zealand. Fax: +64 3 479 7906; Tel: +64 3 479 4897;

Author to whom correspondence should be addressed ([sgoswami@chemistry.otago.ac.nz](mailto:sgoswami@chemistry.otago.ac.nz))

### Calculation of Number of reacted silanol groups per square nanometer on silica surface

Percentage organic content on silica surface after APS modification is 11.8 wt-%.

Silica : Degussa, Aerosil 200<sup>®</sup>, diameter = 12 nm

Specific surface area of silica particle = 200 m<sup>2</sup>/g (from the manufacturer)

 Surface Area of a sphere is given by:  $4\pi r^2$

∴ surface area of silica with 12 nm diameter is:

$$4 \times 3.14 \times (6 \times 10^{-9})^2 = 4.52 \times 10^{-16} \text{ m}^2$$

Since Mass = surface Area / specific surface area

$$\begin{aligned} \therefore \text{mass of the given silica} &= 4.52 \times 10^{-16} \text{ m}^2 / 200 \text{ m}^2/\text{g} \\ &= 2.26 \times 10^{-18} \text{ g} \end{aligned}$$

Considering that all the organic content on the silica degrades, including the amino-propyl group and the two-hydroxy groups of the attached APS, the molecular weight of the organic content coming off is **92.11**

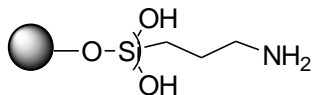

Molar mass of organic content on modified silica = molecular weight of the organic content divided by Avogadro's constant

$$\text{Molar mass of the organic content on modified silica} = 92.11 / 6.023 \times 10^{23} = 1.53 \times 10^{-22} \text{ g}$$

$$\text{Total weight of organic content on silica} = \text{Mass of Silica} \times \left\{ \frac{\% \text{ organic content on silica} / 100}{1 - \% \text{ organic content on silica} / 100} \right\}$$

$$\text{Total weight of organic content on silica} = 2.26 \times 10^{-18} \times \left\{ \frac{11.8/100}{1-11.8/100} \right\}$$

$$\text{Total weight of organic content on silica} = 2.26 \times 10^{-18} \times 0.13$$

$$\text{Total weight of organic on silica} = 2.94 \times 10^{-19} \text{ g}$$

Dividing this by the molar mass of the organic content on modified silica ( $1.53 \times 10^{-22}$  g calculated from TGA) gives the total number of reacted silanol groups present on silica surface.

$$\begin{aligned} \therefore \text{Total number of reacted silanol groups on silica surface} &= 2.94 \times 10^{-19} / 1.53 \times 10^{-22} \\ &= 1921 \end{aligned}$$

Number of reacted silanol groups per square nanometer on silica surface = Total no. of  
reacted silanol groups present on silica surface / surface area of silica particle

Number of reacted silanol groups per square nanometer on silica surface =

$$1921 / 452 = \mathbf{4.2 \text{ reacted OH (silanol) groups / nm}^2}$$

**Fig. S1**  $^{13}\text{C}$  NMR of SiAP

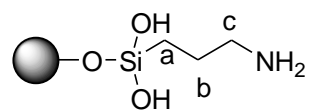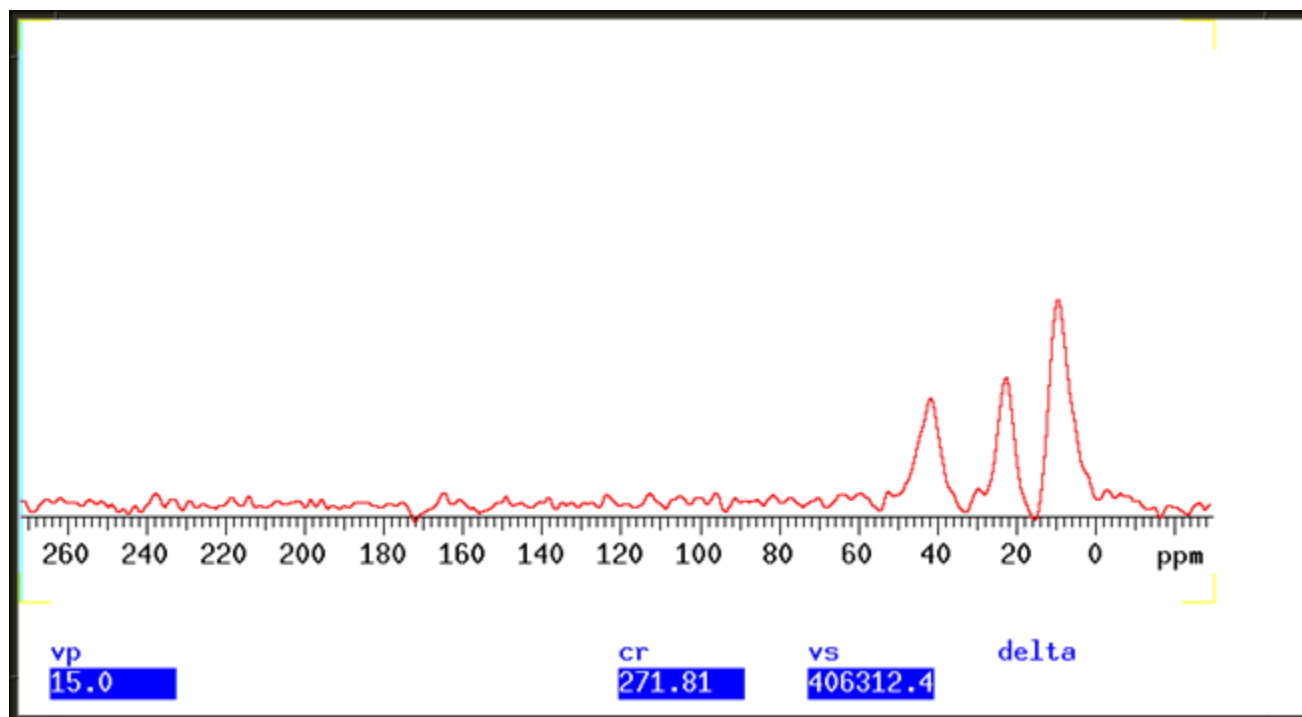

**Fig. S2**  $^{13}\text{C}$  NMR of SiAc

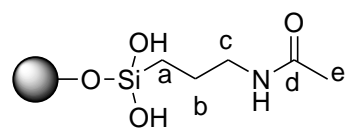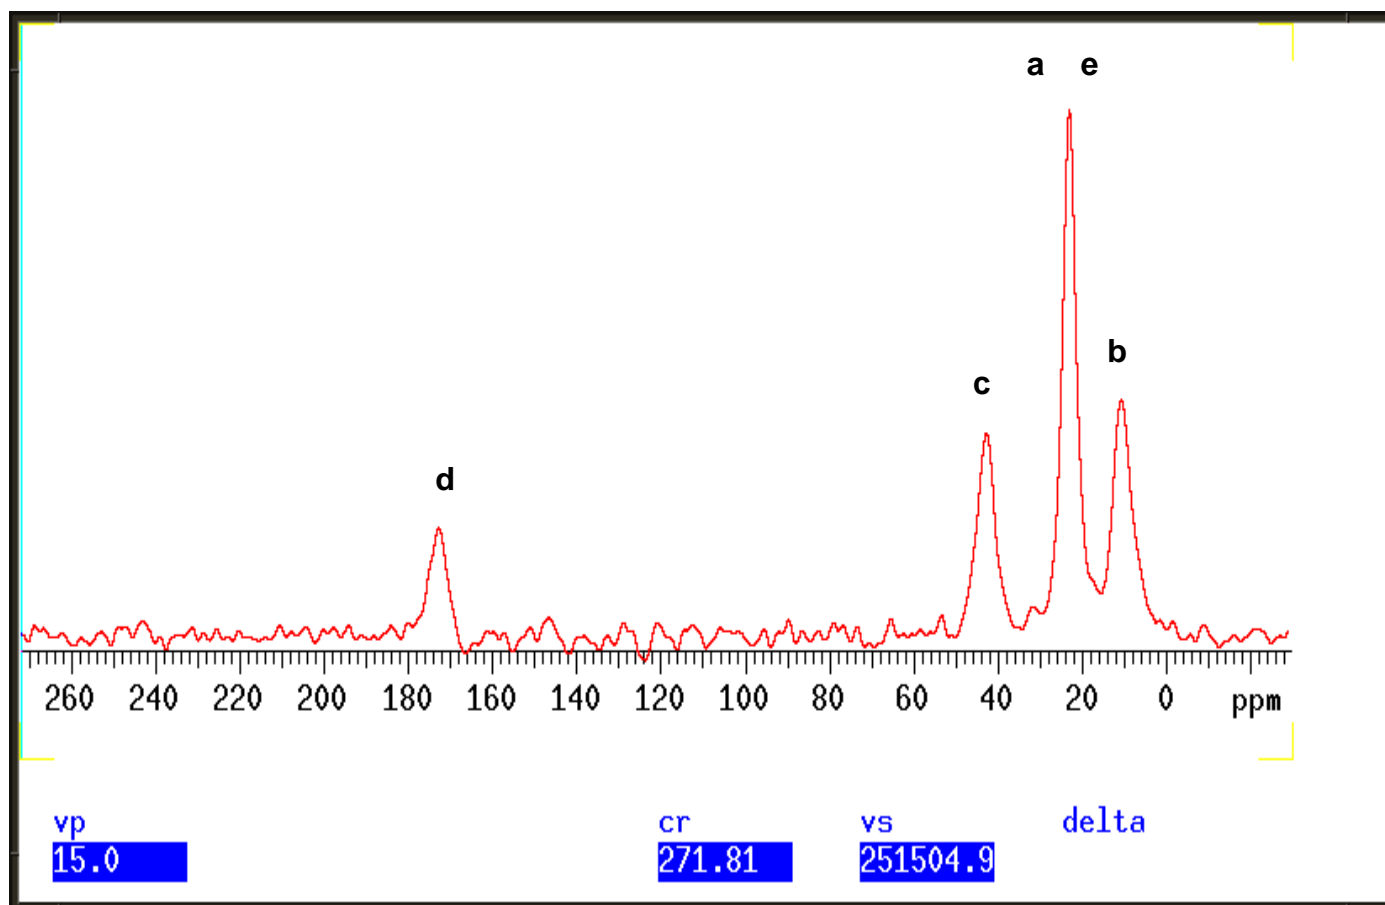

**Fig. S3**  $^{13}\text{C}$  NMR of SiSA

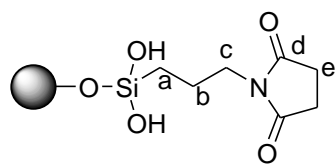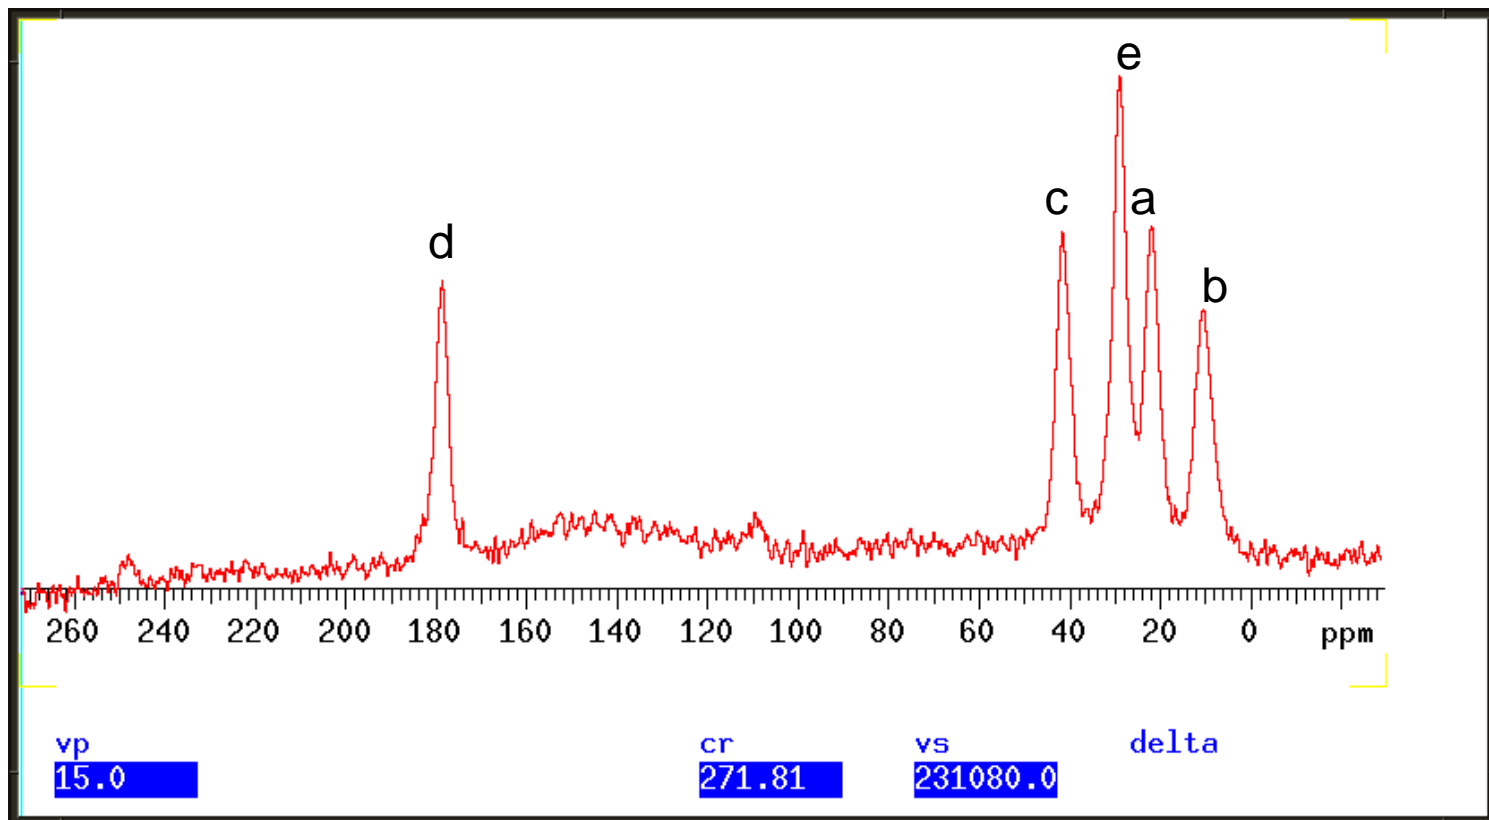

**Fig. S4**  $^{13}\text{C}$  NMR of SiMA

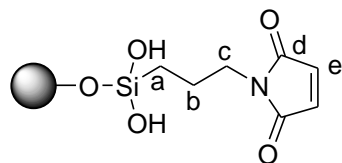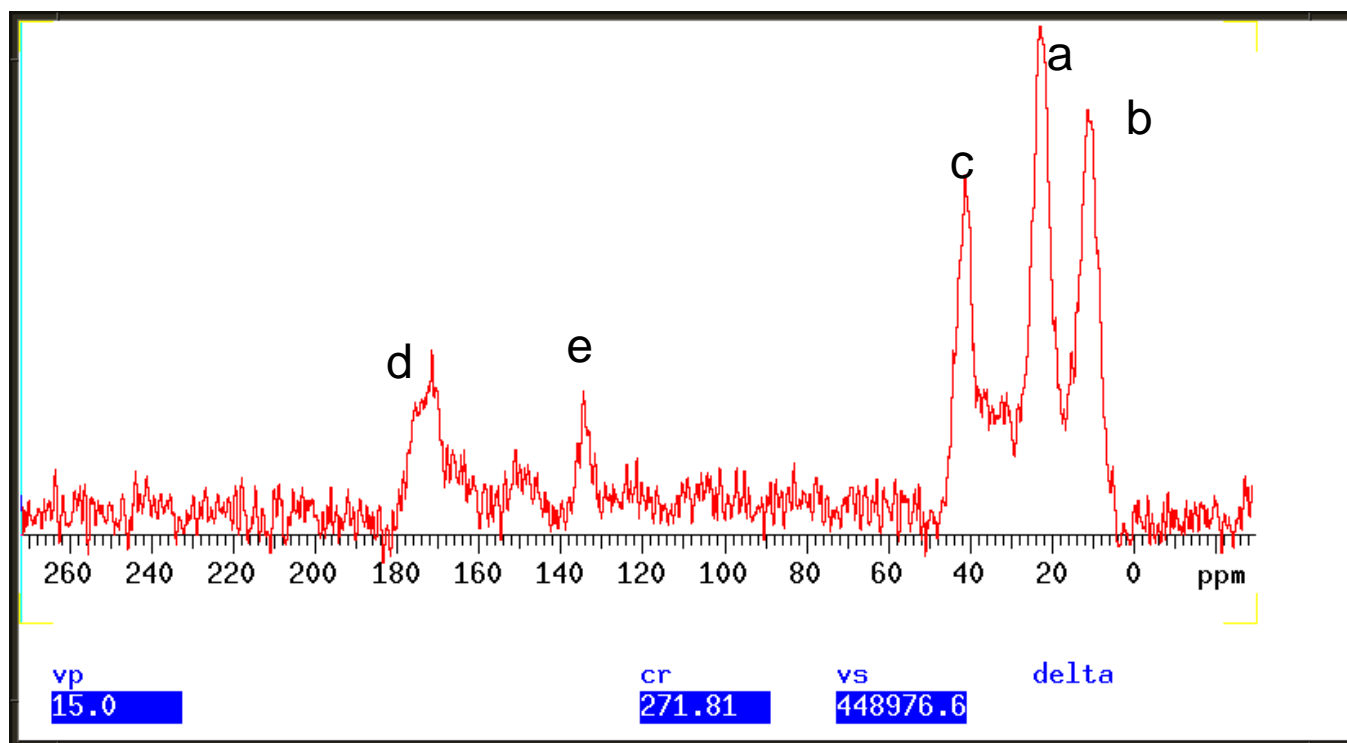

**Fig. S5**  $^{13}\text{C}$  NMR of SiPA

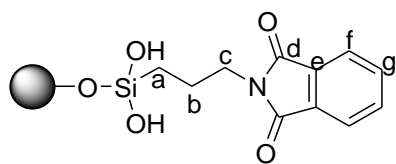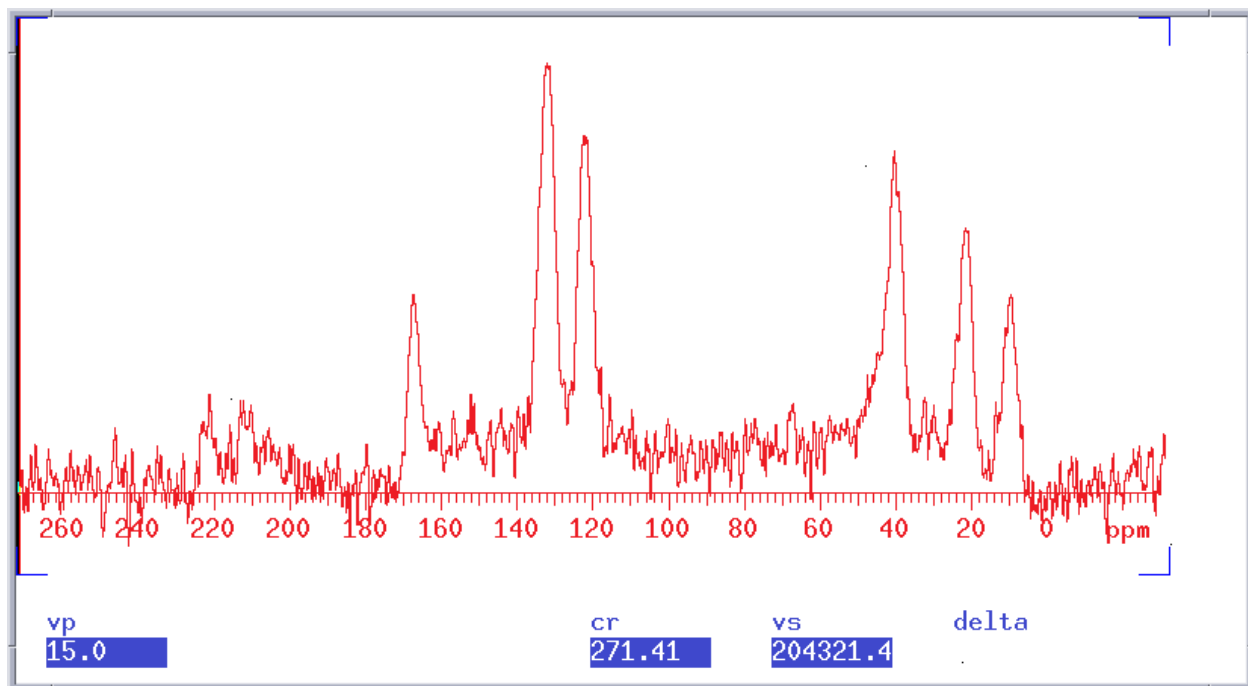



**Fig. S6**  $^{13}\text{C}$  NMR of SiTPA

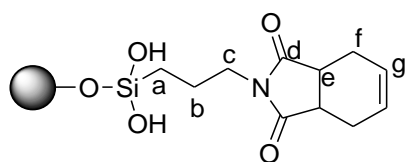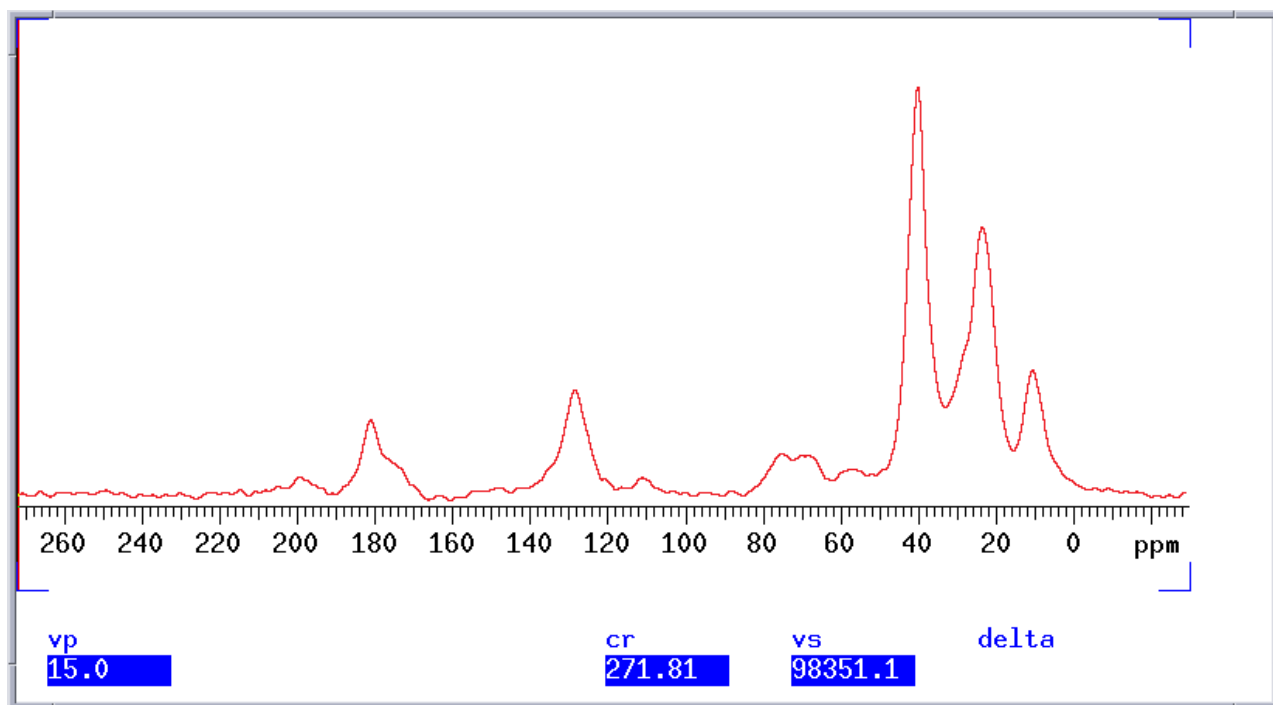

**Fig. S7** FT-IR spectra of (1) untreated nano-SiO<sub>2</sub> and after modification with (2) APS, (3) APS/acetic anhydride, (4) APS/succinnic anhydride, (5) APS/maleic anhydride, (6) APS/phthalic anhydride, (7) APS/tetrahydrophthalic anhydride.

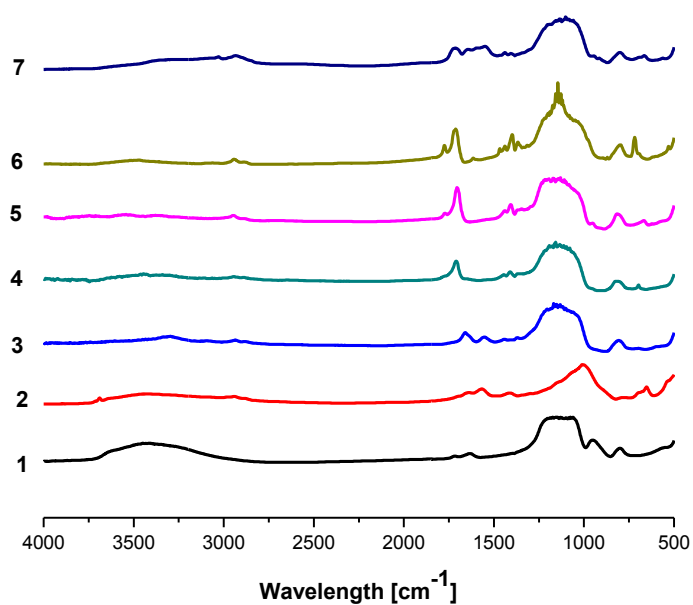

Supplement: c3ta10381a.pdf [file c3ta10381a.pdf]
